# Supplementary material
Source: PubMed Central journal article supplement (PMC6209313)
Supplement: mp8b00699_si_001.pdf [file mp8b00699_si_001.pdf]

# Supporting Information: Impact of Drug Physicochemical Properties on Lipolysis- triggered Drug Supersaturation and Precipitation from Lipid-Based Formulations

Linda C. Alskär,<sup>1</sup> Janneke Keemink,<sup>1</sup> Jenny Johannesson,<sup>1</sup> Christopher J. H. Porter<sup>2</sup> and  
Christel A. S. Bergström<sup>1,2\*</sup>

<sup>1</sup> Department of Pharmacy, Uppsala University, Uppsala Biomedical Center P.O Box 580, SE-751 23 Uppsala, Sweden

<sup>2</sup> Drug Delivery, Disposition and Dynamics, Monash Institute of Pharmaceutical Sciences, Monash University, 381 Royal Parade, Parkville, Victoria 3052, Australia

\*Address correspondence to:

Christel A. S. Bergström, PhD  
Department of Pharmacy, Uppsala University  
BMC P.O. Box 580  
SE-751 23 Uppsala, Sweden

Email: [christel.bergstrom@farmaci.uu.se](mailto:christel.bergstrom@farmaci.uu.se)

Phone: +46 – 18 471 4118

All solubility samples in dispersion and digestion media, as well as drug loaded IIIB-MC lipolysis samples were analyzed by an HPLC coupled to a diode array detector (1290 Infinity with a Zorbrax Eclipse XDB-C18 column 4.6 x 100 mm, Agilent Technologies, USA). The accuracy of the HPLC-analyzes was controlled by quality control samples, prepared from a separate stock solution and recovery samples with a known concentration of drug. Prior to analysis, diluted samples were centrifuged at 22 °C, 21,000 g for 10 min. The injection volume was consistently 20 ul. Compound-specific analytical conditions are found in Table S1.

**Table S1.** Compound-specific HPLC analytical conditions.

| Compound     | Mobile phase<br>(% v/v)              |                                      | Wavelength<br>(nm) | Flow<br>rate<br>(ml/min) | t <sub>r</sub><br>(min) |
|--------------|--------------------------------------|--------------------------------------|--------------------|--------------------------|-------------------------|
|              | Solvent A                            | Solvent B                            |                    |                          |                         |
| Cinnarizine  | 80% 25 mM NaAc buffer pH 5.0         | 20% ACN                              | 253                | 1.0                      | 2.4                     |
| Danazol      | 30% 25 mM NaAc buffer pH 5.0         | 70% ACN                              | 286                | 1.0                      | 2.5                     |
| Felodipine   | 20% 25 mM NaAc buffer pH 5.0         | 80% ACN:MeOH 1:1                     | 360                | 1.0                      | 2.0                     |
| Griseofulvin | 40% H <sub>2</sub> O                 | 60% ACN                              | 292                | 1.0                      | 1.5                     |
| Haloperidol  | 40% 25 mM NaAc buffer pH 5.0         | 60% ACN:MeOH 1:1                     | 248                | 0.8                      | 1.9                     |
| Indomethacin | 70% ACN:H <sub>2</sub> O:FA 95:5:0.1 | 30% ACN:H <sub>2</sub> O:FA 5:95:0.1 | 320                | 1.0                      | 1.9                     |
| Ketoconazole | 40% 10 mM PH buffer pH 8.5           | 60% ACN                              | 297                | 0.8                      | 2.3                     |
| Niclosamide  | 75% ACN:H <sub>2</sub> O:FA 95:5:0.1 | 25% ACN:H <sub>2</sub> O:FA 5:95:0.1 | 332                | 1.0                      | 2.4                     |

Abbreviations: Retention time (t<sub>r</sub>)

**Table S2.** X-variables and Y-response used as input for PLS-DA of drug precipitation behavior from LBFs under digestive conditions.

| Compound        | Mw<br>(g/mol) | A/B/N | Ionized<br>at<br>lipolysis | T <sub>m</sub><br>(°C) | GF/nGF | Solid<br>form |
|-----------------|---------------|-------|----------------------------|------------------------|--------|---------------|
| Carvedilol      | 406.5         | B     | n                          | 115                    | GF     | A             |
| Cinnarizine     | 368.6         | B     | y                          | 119                    | GF     | A             |
| Danazol         | 337.5         | N     | n                          | 227                    | GF     | C             |
| Felodipine      | 384.3         | N     | n                          | 143                    | GF     | A             |
| Fenofibrate     | 360.9         | N     | n                          | 79                     | GF     | C             |
| Griseofulvin    | 352.8         | N     | n                          | 217                    | nGF    | C             |
| Halofantrine    | 500.5         | B     | y                          | 89                     | nd     | A             |
| Indomethacin    | 357.8         | A     | y                          | 160                    | GF     | A             |
| Loratidine      | 382.9         | B     | n                          | 134                    | GF     | C             |
| Niclosamide     | 327.1         | A     | n                          | 231                    | nGF    | C             |
| Simvastatin     | 418.6         | N     | n                          | 135                    | GF     | A             |
| Tolfenamic acid | 261.7         | A     | y                          | 213                    | nGF    | C             |

Abbreviations: acid (A); base (B); neutral in the pH range 2–12 (N), No (n), Yes (y), not determined (nd), glass-former (GF), non-glassformer (nGF), amorphous (A), crystalline (C).

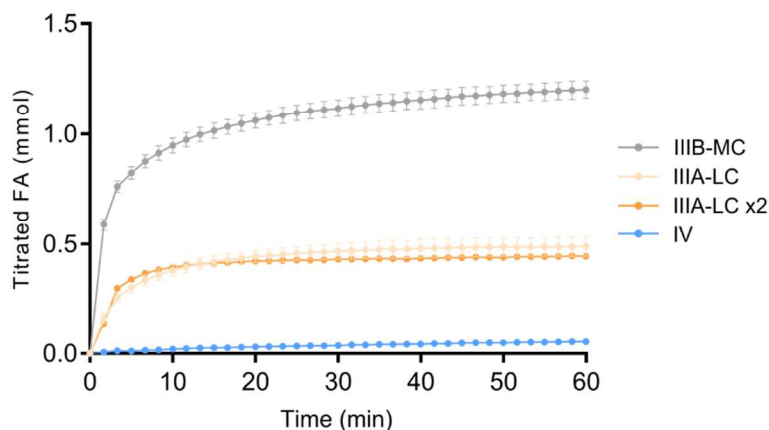

**Figure S1.** Liberated ionized free fatty acids (FFAs) during 60 minutes of *in vitro* digestion (37 °C) from LBFs; IIIA-LC, IIIB-MC and IV (n =3). The IIIA-LC was digested using 4.44 ml (IIIA-LC) and 8.88 ml (IIIA-LC x2) of the pancreatic extract (n = 1). The similar FFA release profiles shows that 4.44 ml of the pancreatic extract (~ 6,600 TBU/ml extract) was sufficient for achieving complete digestion. The values have been corrected for the level of FFA released by the lipolysis media.

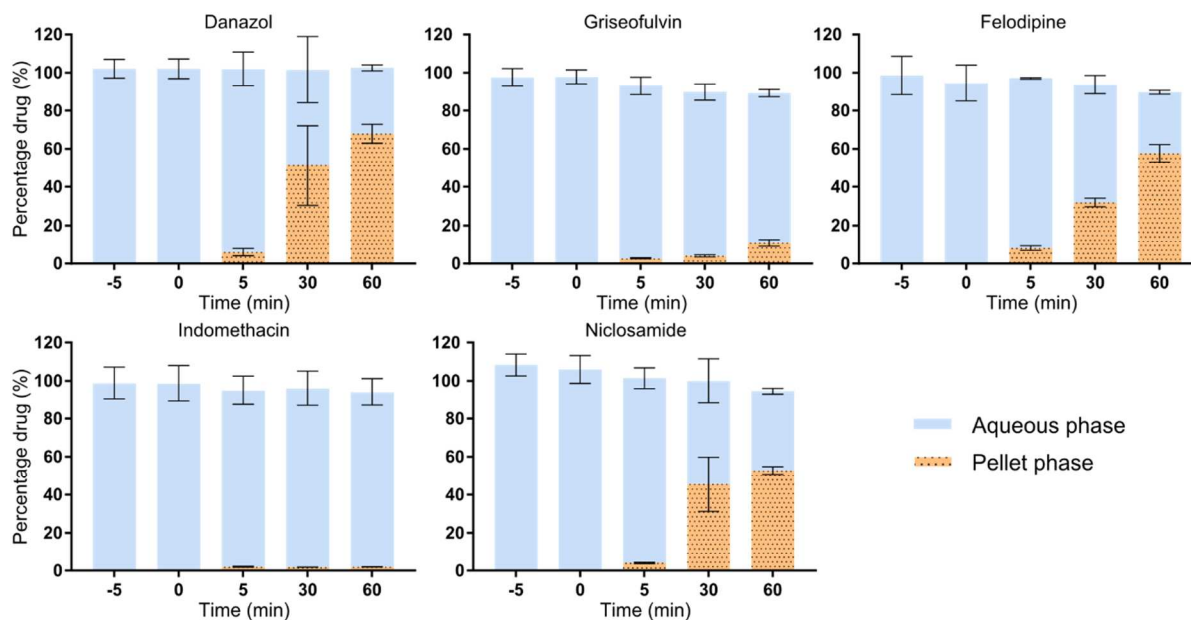

**Figure S2.** Percentage of drug in aqueous and pellet phase respectively (37 °C, pH 6.5), at 5 and 10 minutes of dispersion and 5, 30, and 60 minutes of digestion.
